# Supplementary material for: Distribution and Probabilistic Risk Assessment of Antibiotics, Illegal Drugs, and Toxic Elements in Gastropods from Southeast China
Source: MDPI journal article supplement (doi:10.3390/foods13081166), 2024-04-11
Supplement: s1 [file s1]

## Supplementary material

---

**Table S1** The mobile phase conditions for antibiotic analysis

| Mobile phase conditions for CAPs<br>(mobile A: 0.05% ammonia solution; B: ACN ) |                | Mobile phase conditions for QNs and TCs<br>(mobile A: 0.1% FA solution; B: MeOH ) |                 |
|---------------------------------------------------------------------------------|----------------|-----------------------------------------------------------------------------------|-----------------|
| Time (min)                                                                      | Mobile B (ACN) | Time (min)                                                                        | Mobile B (MeOH) |
| 0~0.5                                                                           | 10%            | 0~1.0                                                                             | 10%             |
| 0.5~2.0                                                                         | 90%            | 1.0~4.5                                                                           | 30%             |
| 2.0~3.0                                                                         | 90%            | 4.5~7.0                                                                           | 99%             |
| 3.0~3.5                                                                         | 10%            | 7.0~9.0                                                                           | 99%             |
| 3.5~5.0                                                                         | 10%            | 9.0~9.1                                                                           | 10%             |

The column is Waters BEH C<sub>18</sub> (1.7 $\mu$ m, 2.1mm $\times$ 100mm)

**Table S2** The mobile phase conditions for illegal drugs and tetrodotoxin

| Mobile phase conditions for MG and LMG<br>(mobile A: 5mM ammonium acetate-0.1% formic acid aqueous solution; B: acetonitrile ) |                |
|--------------------------------------------------------------------------------------------------------------------------------|----------------|
| Time (min)                                                                                                                     | Mobile B (ACN) |
| 0~1                                                                                                                            | 30%            |
| 1.0~5.0                                                                                                                        | 95%            |
| 5.0~7.0                                                                                                                        | 95%            |
| 7.0~7.1                                                                                                                        | 30%            |
| 7.1~90                                                                                                                         | 30%            |

The column for MG and LMG is Waters BEH C18 (1.7 $\mu$ m, 2.1mm $\times$ 100mm)

**Table S3** The parameters of mass spectrometry for targeted analytes

| Compounds     |                                     | Molecular formula                                                                           | Ion source | Precursor Ion (m/z) | Product Ion (m/z) | Collision Energy (eV) | Cone voltage (V) |
|---------------|-------------------------------------|---------------------------------------------------------------------------------------------|------------|---------------------|-------------------|-----------------------|------------------|
| QNs           | Ciprofloxacin                       | C <sub>17</sub> H <sub>18</sub> FN <sub>3</sub> O <sub>3</sub>                              | ESI+       | 332.2               | 314.3/288.3       | 19/17                 | 36               |
|               | Enrofloxacin                        | C <sub>19</sub> H <sub>22</sub> FN <sub>3</sub> O <sub>3</sub>                              | ESI+       | 360.3               | 316.4/342.3       | 19/23                 | 38               |
|               | Lomefloxacin                        | C <sub>17</sub> H <sub>19</sub> F <sub>2</sub> N <sub>3</sub> O <sub>3</sub>                | ESI+       | 352.3               | 265.2/308.3       | 23/17                 | 36               |
|               | Norfloxacin                         | C <sub>16</sub> H <sub>18</sub> FN <sub>3</sub> O <sub>3</sub>                              | ESI+       | 320.3               | 302.3/276.3       | 19/17                 | 50               |
|               | Norfloxacin-d <sub>5</sub>          | C <sub>16</sub> H <sub>13</sub> D <sub>5</sub> FN <sub>3</sub> O <sub>3</sub>               | ESI+       | 325.1               | 281.1             | 12                    | 50               |
|               | Ofloxacin                           | C <sub>18</sub> H <sub>20</sub> FN <sub>3</sub> O <sub>4</sub>                              | ESI+       | 362.2               | 318.3/261.2       | 18/27                 | 38               |
|               | Pefloxacin                          | C <sub>17</sub> H <sub>20</sub> FN <sub>3</sub> O <sub>3</sub>                              | ESI+       | 334.3               | 290.3/233.2       | 17/25                 | 38               |
| TCs           | Chlortetracycline                   | C <sub>22</sub> H <sub>23</sub> ClN <sub>2</sub> O <sub>8</sub>                             | ESI+       | 479.2               | 426/444           | 18/10                 | 40               |
|               | Doxycycline                         | C <sub>22</sub> H <sub>24</sub> N <sub>2</sub> O <sub>8</sub>                               | ESI+       | 445                 | 428/153.9         | 14/20                 | 30               |
|               | Oxytetracycline                     | C <sub>22</sub> H <sub>24</sub> N <sub>2</sub> O <sub>9</sub>                               | ESI+       | 461                 | 426/443           | 18/10                 | 40               |
|               | Tetracycline                        | C <sub>22</sub> H <sub>24</sub> N <sub>2</sub> O <sub>8</sub>                               | ESI+       | 445                 | 410/427           | 25/15                 | 35               |
|               | Tetracycline-d <sub>6</sub>         | C <sub>22</sub> H <sub>18</sub> D <sub>6</sub> N <sub>2</sub> O <sub>8</sub>                | ESI+       | 445                 | 410               | 30                    | 35               |
| CAPs          | Chloramphenicol                     | C <sub>11</sub> H <sub>12</sub> Cl <sub>2</sub> N <sub>2</sub> O <sub>5</sub>               | ESI-       | 321                 | 152/257           | 18/16                 | 22               |
|               | Chloramphenicol-d <sub>5</sub>      | C <sub>11</sub> H <sub>7</sub> D <sub>5</sub> Cl <sub>2</sub> N <sub>2</sub> O <sub>5</sub> | ESI-       | 326                 | 157               | 15                    | 25               |
|               | Thiamphenicol                       | C <sub>12</sub> H <sub>15</sub> Cl <sub>2</sub> NO <sub>5</sub> S                           | ESI-       | 354                 | 185/290           | 18/10                 | 14               |
|               | Florfenicol                         | C <sub>12</sub> H <sub>14</sub> Cl <sub>2</sub> FNO <sub>4</sub> S                          | ESI-       | 356                 | 336/185           | 10/10                 | 25               |
|               | Florfenicol amine                   | C <sub>10</sub> H <sub>14</sub> FNO <sub>3</sub> S                                          | ESI+       | 248                 | 230/130           | 10/10                 | 25               |
| NMZ           | Metronidazole                       | C <sub>6</sub> H <sub>9</sub> N <sub>3</sub> O <sub>3</sub>                                 | ESI+       | 172.1               | 128.1/82.1        | 17/20                 | 45               |
|               | Metronidazole-d <sub>4</sub>        | C <sub>6</sub> H <sub>5</sub> D <sub>4</sub> N <sub>3</sub> O <sub>3</sub>                  | ESI+       | 176.1               | 128.1             | 22                    | 20               |
| Illegal drugs | Malachite green                     | C <sub>23</sub> H <sub>26</sub> N <sub>2</sub> O                                            | ESI+       | 329.5               | 208/313.4         | 40/35                 | 40               |
|               | Malachite green-d <sub>5</sub>      | C <sub>23</sub> H <sub>21</sub> D <sub>5</sub> N <sub>2</sub> O                             | ESI+       | 334.4               | 213.1/318.3       | 40/40                 | 40               |
|               | Leucomalachite green                | C <sub>23</sub> H <sub>26</sub> N <sub>2</sub>                                              | ESI+       | 331.5               | 239.3/316.4       | 33/20                 | 40               |
|               | Leucomalachite green-d <sub>5</sub> | C <sub>23</sub> H <sub>21</sub> D <sub>5</sub> N <sub>2</sub>                               | ESI+       | 336.4               | 239.2             | 30                    | 40               |

**Table S4** The parameters of ICP-MS for Cd and As

| Parameter                       | Value      | Parameter                     | Value                         |
|---------------------------------|------------|-------------------------------|-------------------------------|
| RF power                        | 1550 W     | Atomizer                      | High salt/concentric atomizer |
| Plasma gas flow rate            | 15 L/min   | Sampling cone/truncation cone | Nickel/Platinum Cone          |
| Carrier gas flow rate           | 0.80 L/min | Sampling depth                | 8 mm~10 mm                    |
| Auxiliary air flow rate         | 0.3 L/min  | Scan mode                     | Jumping peak                  |
| Helium flow rate                | 4~5 mL/min | Detection type                | automatic                     |
| Atomization chamber temperature | 2 °C       | points per peak               | 3                             |
| Sample lifting rate             | 0.3 r/s    | Repetitions                   | 3                             |

**Table S5** Parameters of Monte Carlo simulation for different population in risk assessment

| Variance   | Unit      | Description       | Distribution | Population                          |            |            |
|------------|-----------|-------------------|--------------|-------------------------------------|------------|------------|
|            |           |                   |              | Children                            | Teens      | Adults     |
| C          | mg/kg     | Concentration     | Log normal   | Aalyzed based on different compound |            |            |
| IR         | g/day     | Daily consumption | Normal       | 7.18±3.9                            | 14.69±9.1  | 20.78±10.5 |
| BW         | kg        | Body weight       | Log normal   | 16.68±1.48                          | 46.25±1.18 | 57.03±1.10 |
| Rfd or ADI | mg/kg/day | Reference dose    | Fixed        | Varied based on different substance |            |            |

**Table S6** The distribution of certain antibiotics in gastropods from different sampling month.

| Sampling month | Enrofloxacin  |         |       |         | Florfenicol   |         |       |         | Florfenicol Amine |         |        |         |
|----------------|---------------|---------|-------|---------|---------------|---------|-------|---------|-------------------|---------|--------|---------|
|                | n             | DF (%)  | Mean  | Maximum | n             | DF (%)  | Mean  | Maximum | n                 | DF (%)  | Mean   | Maximum |
| 5              | 49            | 0       |       |         | 29            | 42.4138 | 25.33 | 427     | 29                | 24.4828 | 87.51  | 2222    |
| 6              | 70            | 8.6571  | 0.296 | 9.13    | 70            | 47.1429 | 20.35 | 396     | 52                | 23.0769 | 6.2    | 55.7    |
| 7              | 108           | 2.7778  | 0.126 | 12.8    | 94            | 68.0851 | 49.35 | 997     | 87                | 63.2184 | 66.16  | 978     |
| 8              | 98            | 7.1429  | 0.089 | 2.2     | 68            | 61.7647 | 59.81 | 1110    | 68                | 60.2941 | 78.47  | 721     |
| 9              | 25            | 4.00    | 0.125 | 3.13    | 22            | 53.6364 | 50.36 | 165     | 22                | 27.2727 | 16.1   | 127     |
|                |               |         |       |         |               |         |       |         |                   |         |        |         |
| Sampling month | Ciprofloxacin |         |       |         | Thiamphenicol |         |       |         | Oxytetracycline   |         |        |         |
|                | n             | DF (%)  | Mean  | Maximum | n             | DF (%)  | Mean  | Maximum | n                 | DF (%)  | Mean   | Maximum |
| 5              | 49            | 0       |       |         | 29            | 24.4828 | 1.19  | 15.2    | 29                | 3.4483  | 1.562  | 45.3    |
| 6              | 70            | 15.7143 | 38.89 | 1110    | 70            | 28.5714 | 4.88  | 136     | 25                | 12.00   | 2.152  | 42.1    |
| 7              | 108           | 2.7778  | 4.07  | 352     | 110           | 52.2727 | 4.75  | 97      | 74                | 5.4054  | 0.198  | 9.9     |
| 8              | 98            | 8.1633  | 11.6  | 434     | 91            | 51.6484 | 4.1   | 62      | 62                | 8.0645  | 103.86 | 6410    |
| 9              | 25            | 0       |       |         | 22            | 42.0014 | 1.97  | 7.59    | 22                | 0       | 0      | 0       |

DF (%): detection frequency, the percentage of detected samples to total samples; Concentration unit is µg/kg

**Table S7** The distribution of Cd and As in gastropods from different sampling month.

| Month | Cd  |        |      |         | As  |        |      |         |
|-------|-----|--------|------|---------|-----|--------|------|---------|
|       | n   | DF (%) | Mean | Maximum | n   | DF (%) | Mean | Maximum |
| 4     | 30  | 100    | 1.41 | 20.8    | 30  | 100    | 6.00 | 22.9    |
| 5     | 32  | 96.88  | 1.27 | 12.6    | 32  | 100    | 4.38 | 12.1    |
| 6     | 112 | 100    | 0.99 | 8.56    | 114 | 100    | 6.65 | 48.2    |
| 7     | 113 | 95.58  | 1.31 | 12.5    | 113 | 100    | 6.41 | 29.3    |
| 8     | 8   | 100    | 0.05 | 0.252   | 8   | 100    | 2.17 | 4.49    |
| 9     | 5   | 100    | 1.86 | 6.99    | 5   | 100    | 7.37 | 21.8    |

DF (%): detection frequency, the percentage of detected samples to total samples; Concentration unit of As and Cd is mg/kg.

**Table S8** The formula and structure of analyzed antibiotics

| Compounds |               | Chemical formula                                                             | Log K <sub>ow</sub> | Structural formula                                                                    |
|-----------|---------------|------------------------------------------------------------------------------|---------------------|---------------------------------------------------------------------------------------|
| QNs       | Ciprofloxacin | C <sub>17</sub> H <sub>18</sub> FN <sub>3</sub> O <sub>3</sub>               | 0.28                | 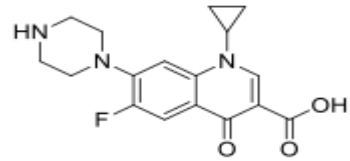   |
|           | Enrofloxacin  | C <sub>19</sub> H <sub>22</sub> FN <sub>3</sub> O <sub>3</sub>               | 1.1, 2.31           |    |
|           | Lomefloxacin  | C <sub>17</sub> H <sub>19</sub> F <sub>2</sub> N <sub>3</sub> O <sub>3</sub> | 0.31                |    |
|           | Norfloxacin   | C <sub>16</sub> H <sub>18</sub> FN <sub>3</sub> O <sub>3</sub>               | -1.03               |  |

| Compounds |                   | Chemical formula                                                | Log K <sub>ow</sub> | Structural formula                                                                    |
|-----------|-------------------|-----------------------------------------------------------------|---------------------|---------------------------------------------------------------------------------------|
|           | Ofloxacin         | C <sub>18</sub> H <sub>20</sub> FN <sub>3</sub> O <sub>4</sub>  | -2.0                | 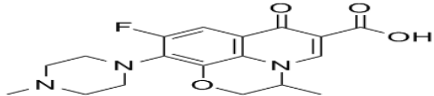   |
|           | Pefloxacin        | C <sub>17</sub> H <sub>20</sub> FN <sub>3</sub> O <sub>3</sub>  | -0.27               |    |
| TCs       | Chlortetracycline | C <sub>22</sub> H <sub>23</sub> ClN <sub>2</sub> O <sub>8</sub> | -0.62               |    |
|           | Doxycycline       | C <sub>22</sub> H <sub>24</sub> N <sub>2</sub> O <sub>8</sub>   | -1.36, -0.02        |   |
|           | Oxytetracycline   | C <sub>22</sub> H <sub>24</sub> N <sub>2</sub> O <sub>9</sub>   | -2.87, -0.9         |  |

| Compounds |                   | Chemical formula                                                              | Log K <sub>ow</sub> | Structural formula                                                                    |
|-----------|-------------------|-------------------------------------------------------------------------------|---------------------|---------------------------------------------------------------------------------------|
|           | Tetracycline      | C <sub>22</sub> H <sub>24</sub> N <sub>2</sub> O <sub>8</sub>                 | -1.33               | 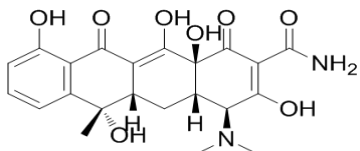   |
| CAPs      | Chloramphenicol   | C <sub>11</sub> H <sub>12</sub> Cl <sub>2</sub> N <sub>2</sub> O <sub>5</sub> | 0.94, 1.14          |    |
|           | Thiamphenicol     | C <sub>12</sub> H <sub>15</sub> Cl <sub>2</sub> NO <sub>5</sub> S             | -0.33, -0.27        |    |
|           | Florfenicol       | C <sub>12</sub> H <sub>14</sub> Cl <sub>2</sub> FNO <sub>4</sub> S            | -0.04               |   |
|           | Florfenicol amine | C <sub>10</sub> H <sub>14</sub> FNO <sub>3</sub> S                            | -1.27               |  |

| Compounds |                      | Chemical formula                                            | Log K <sub>ow</sub> | Structural formula                                                                  |
|-----------|----------------------|-------------------------------------------------------------|---------------------|-------------------------------------------------------------------------------------|
|           | Metronidazole        | C <sub>6</sub> H <sub>9</sub> N <sub>3</sub> O <sub>3</sub> | -                   | 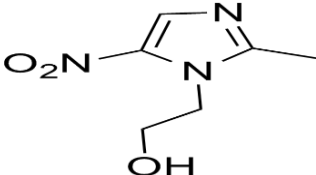 |
|           | Malachite green      | C <sub>23</sub> H <sub>26</sub> N <sub>2</sub> O            | -                   |  |
|           | Leucomalachite green | C <sub>23</sub> H <sub>26</sub> N <sub>2</sub>              | -                   |  |
